# Supplementary material for: From polar bears to cell polarity and everything in between: 2018 in review
Source: Oxford University Press journal article supplement (doi:10.1242/bio.042119), 2019-02-15
Supplement: bio042119supp.pdf [file bio042119supp.pdf]

## **Reviewers for Biology Open 2018**

Daijiro Abe, Kyushu Sangyo University, Japan

Susan Abmayr, Stowers Institute for Medical Research, USA

Sandra Acosta, Northwestern University, USA

Jo Adams, Bristol University, UK

Hala Alameddine, Institut de Myologie, France

Rosa Alduina, Università degli Studi di Palermo, Italy

Geneviève Almouzni, CNRS/Institut Curie, France

Ronald Altig, Mississippi State University, USA

Fabrisio Alustiza, National Institute of Agriculture, Argentina

Luca Ardigo, University of Verona, Italy

Estela Area-Gomez, Columbia University, USA

Takahiro Arima, Tohoku University School of Medicine, Japan

Gary Armstrong, McGill University, Canada

Sophie Astrof, Weill Cornell Medical College, USA

Vinzenz Auersperg, LKH Steyr, Austria

Hrvoje Augustin, King's College London, UK

Jeremy Bailoo, University of Bern, Switzerland

Richard Baines, University of Manchester, UK

Joseph Bak Coleman, Princeton University, USA

George Bakken, Indiana State University, USA

Clair Baldock, University of Manchester, UK

Sigal Balshine, McMaster University, Canada

Jacques Balthazart, University of Liège, Belgium

Jay Baltz, University of Ottawa, Canada

Antonio Baonza, Centro de Biología Molecular "Severo Ochoa", Spain

Alexis Barr, Institute of Cancer Research, UK

Elias Barriga, University College London, UK

Jorge Barriuso, CSIC, Spain

Sanjay Basak, National Institute of Nutrition (ICMR), India

Caroline Beck, University of Otago, New Zealand  
Mathieu Beraneck, Université Paris Descartes, France  
James Biardi, Fairfield University, USA  
Sherryl Bisgrove, Simon Fraser University, Canada  
Carl Blobel, Weill Cornell Medical College, USA  
Michele Boiani, Max Planck Institute for Molecular Biomedicine, Germany  
Carla Boitani, University of Rome, Italy  
Jorge Bolivar, University of Cádiz, Spain  
Niels Bols, University of Waterloo, Canada  
Majbritt Bolton-Warberg, NUI Galway, Ireland  
Juan Bonifacino, Eunice Kennedy Shriver National Institute, USA  
Daniel Bouvard, Institute for Advanced Biosciences, France  
Natalie Bowling, Goldsmiths University, UK  
Teresa Bowman, Albert Einstein College of Medicine, USA  
Julia Bowsher, North Dakota State University, USA  
Peter Brennan, University of Bristol, UK  
James Briscoe, Francis Crick Institute, UK  
Roger Brooks, University of Cambridge, UK  
Dennis Bruemmer, University of Pittsburgh, USA  
Marcela Buchtova, Czech Academy of Sciences, Czech Republic  
Gerard Cabello, University of Montpellier, France  
Heather Caldwell, Kent State University, USA  
Claudio Cantù, Linköping University, Sweden  
Vincent Careau, University of Ottawa, Canada  
Ugo Carraro, University of Padua, Italy  
Clement Champion, University of Oxford, UK  
J. Ross Chapman, University of Oxford, UK  
Pavithra Chavali, MRC Laboratory of Molecular Biology, UK  
Xiaodong Chen, Chinese Academy of Sciences, China  
Pascale Chevret, University of Lyon, France

Keith Choe, University of Florida, USA  
Seyeon Chung, Louisiana State University, USA  
Dillon Chung, University of British Columbia, Canada  
Maria Cirio, University of Pittsburgh, USA  
Susan Clarke, Queens University Belfast, UK  
Peter Claus, Hannover Medical School, Germany  
Orna Cohen-Fix, NIH/NIDDK, USA  
Jerome Collignon, Institut Jacques Monod, France  
Martin Collinson, University of Aberdeen, UK  
Cecilia Conaco, University of the Philippines, Philippines  
Lynne Cox, University of Oxford, UK  
Gabriel Cristobal, Instituto de Optica, Spain  
Kevin Crombie, University of Wisconsin-Madison, USA  
Gage Crump, University of Southern California, USA  
Kaveh Daneshvar, Harvard Medical School, USA  
Jose de Celis, Centro de Biologia Molecular "Severo Ochoa", Spain  
Luis De León, University of Massachusetts Boston, USA  
Javier del Barco-Trillo, Museo Nacional de Ciencias Naturales, Spain  
Jack Dienes, University of Virginia, USA  
Patrick DiMario, Louisiana State University, USA  
Alexandre Djiane, IRCM, France  
Paolo Domenici, Consiglio Nazionale delle Ricerche, Italy  
Jingao Dong, Agricultural University of Hebei, China  
Richard Dorsky, University of Utah, USA  
Angela Douglas, Cornell University, USA  
Dennis Drescher, Wayne State University, USA  
Remi Dumollard, Observatoire Océanologique de Villefranche-sur-Mer, France  
Catherine Dupont, Erasmus MC, Netherlands  
Angela Eads, Trent University, Canada  
Benjamin Eaton, UT Health San Antonio, USA

Robert Eferl, Medical University Vienna, Austria  
Jocelyn Eidahl, Nationwide Children's Hospital, USA  
Sharyn Endow, Duke University Medical Center, USA  
Thomas Endres, Otto von Guericke University, Germany  
Rebecca Estrada, Albert Einstein College of Medicine, USA  
Todd Evans, Weill Cornell Medical College, USA  
Marcilio Fagundes, State University of Montes Claros, Brazil  
Denis Falconet, Biosciences and Biotechnology Institute of Grenoble, France  
Xiaorong Fan, Nanjing Agricultural University, China  
Antonio Ferrante, University of Adelaide, Australia  
Julia Fine, University of Illinois Urbana-Champaign, USA  
Elif Firat-Karalar, Koç University, Turkey  
Ann Foley, Clemson University, USA  
Nicolas Foray, Centre de Recherche en Cancérologie de Lyon (CRCL), France  
Jose Maria Frade, Cajal Institute (CSIC), Spain  
Diego Franco, University of Jaen, Spain  
Santos Franco, University of Colorado Denver, USA  
Omar Franco, NorthShore University, USA  
Laina Freyer, Institut Pasteur, France  
Friedrich Frischknecht, University of Heidelberg, Germany  
Jessica Frith, Monash University, Australia  
Ernst-Martin Fuchtbauer, Aarhus University, Denmark  
Mamoru Fukuchi, Takasaki University of Health and Welfare, Japan  
Johannes Funken, German Sport University Cologne, Germany  
David Furness, Keele University, UK  
Yasuhide Furuta, RIKEN, Japan  
Bart Gadella, Utrecht University, Netherlands  
Roberto Galizi, Imperial College London, UK  
Melissa Gamat, University of Wisconsin Carbone Cancer Center, USA  
Maria Garcia-Garcia, Cornell University, USA

Alfonsina Gattuso, University of Calabria, Italy  
Raphael Gelin-Alessi, Keio University, Japan  
Barbara Ghinassi, Università degli Studi "G. d'Annunzio", Italy  
Jiaxin Gong, UMASS Medical School, USA  
Mubeen Goolam, University of Oxford, UK  
Stanislav Gorb, University of Kiel, Germany  
Thomas Gorr, University of Zurich, Switzerland  
Cara Gottardi, Northwestern University, USA  
Elda Grabocka, Jefferson University, USA  
Thomas Greb, Ruprecht-Karls University Heidelberg, Germany  
Jeremy Green, King's College London, UK  
Savraj Grewal, University of Calgary, Canada  
Eric Griffis, University of Dundee, UK  
Yevgenya Grinblat, University of Wisconsin, USA  
Gerolf Gros, Hannover Medical School, Germany  
Paramjit Grover, Indian Institute of Chemical Technology, India  
Deborah Guest, Animal Health Trust, UK  
Antoine Guichet, Institut Jacques Monod, France  
Mohan Gupta, Iowa State University, USA  
Peter Hansen, University of Florida, USA  
Christine Hartmann, Institut for Experimental Musculoskeletal Medicine (IEMM), Germany  
Yutaka Hata, Tokyo Medical and Dental University, Japan  
Severin Hatt, University of Liège, Belgium  
Silke Hauf, Virginia Tech, USA  
Jon Hazeldine, Queen Elizabeth Hospital Birmingham, UK  
Karla Helbig, La Trobe University, Australia  
Gary Henehan, Dublin Institute of Technology, Ireland  
Yann Herault, CNRS Institut de Transgenose, France  
Neill Herbert, University of Auckland, New Zealand  
Tory Herman, University of Oregon, USA

Greg Hermann, Lewis & Clark College, USA  
M.Paz Herraez, University of León, Spain  
Daniel Hesselton, Garvan Institute of Medical Research, Australia  
Dineshani Hettiarachchi, University of Colombo, Sri Lanka  
Andrew Heyward, Australian Institute of Marine Science, Australia  
Gary Hime, University of Melbourne, Australia  
William Hintz, Darrin Fresh Water Institute, USA  
Susumu Hirabayashi, Imperial College London, UK  
Hiroaki Hirata, Nagoya University, Japan  
Craig Hodges, Case Western University, USA  
Michiyo Honda, Meiji University, Japan  
Stefan Hoppler, The University of Aberdeen, UK  
Vishnu Hosur, The Jackson Laboratory, USA  
Martin How, University of Bristol, UK  
Alan Howe, University of Vermont, USA  
Michael Howell, Incyte Corporation, USA  
Albert Imsland, Akvaplan niva, Norway  
Junichi Iwata, The University of Texas, USA  
Roshan Jain, Haverford College, USA  
Sue Jaspersen, Stowers Institute for Medical Research, USA  
Loydie Jerome-majewska, McGill University, Canada  
Bruno Jesus, University of Lisbon, Portugal  
Eva Jimenez-Mateos, RCSI Royal College of Surgeons, Ireland  
Christine Johnson, American Museum of National History, USA  
Bradley Jones, The University of Mississippi, USA  
Nina Kaludercic, The University of Padua, Italy  
Shinji Kamimura, Chuo University, Japan  
Ritsu Kamiya, Chuo University, Japan  
David Kaplan, Hospital for Sick Children, Canada  
Atsuko Kasahara, Kanazawa University, Japan

Hideki Katow, Tohoku University, Japan

Gaurav Kaushik, University of Wisconsin-Madison, USA

David Keays, Research Institute of Molecular Pathology (IMP), Austria

Steven Kelly, University of Oxford, UK

Mineko Kengaku, Kyoto University, Japan

Mikami Kenichiro, Hirosaki University, Japan

Thomas Kidd, University of Nevada, USA

John Kilmartin, MRC Laboratory of Molecular Biology, UK

Dennis Kim, Massachusetts Institute of Technology, USA

Jeong-Ho Kim, Gangneung-Wonju National University, South Korea

Masato Kinoshita, Kyoto University, Japan

Caghan Kizil, German Center for Neurodegenerative Diseases, Germany

Malgorzata Kloc, The Methodist Hospital Research Institute, USA

Tatsuya Kobayashi, Massachusetts General Hospital, USA

Nastasia Kosheleva, FSBSI Institute of General Pathology and Pathophysiology, Russia

Michael Krahn, University Hospital of Munster, Germany

Kenneth Kramer, Creighton University, USA

Bjarni Kristjánsson, Hólar University College, Iceland

Jens Kroll, Heidelberg University, Germany

Vladimir Krylov, Charles University in Prague, Czech Republic

Nobuhiro Kurabayashi, University of Tokyo, Japan

Kelvin Kwan, Rutgers University, USA

Michael Kyba, UT Southwestern Medical Center, USA

Charalambos Kyriacou, University of Leicester, UK

Soni Lacefield, Indiana University, USA

Eileen Lafer, UT Health San Antonio, USA

Irina Larina, Baylor College of Medicine, USA

Giovanna Lattanzi, Istituto di Genetica Molecolare (IGM), Italy

Adeline Lau, South Australian Health and Medical Research Institute, Australia

Luigi Leanza, University of Padua, Italy

Katie Lee, University of Minnesota, USA

Jae-Seong Lee, Sungkyunkwan University, South Korea

Emilie Legue, Yale University, USA

Charlotte LeKieffre, Ecole Polytechnique Federale de Lausanne, Switzerland

Tanmay Lele, University of Florida, USA

Annalisa Letizia, Institut de Biologia Molecular de Barcelona (IBMB), Spain

Nicholas Levis, University of North Carolina, USA

Ceri Lewis, University of Exeter, UK

Tylor Lewis, Duke University, USA

Petros Ligoxygakis, University of Oxford, UK

Yat-Yuen Lim, University of Malaya, Malaysia

Milton Lima Neto, UNESP, Brazil

Jen-Wei Lin, Boston University, USA

Zhonghua Liu, Northeast Agricultural University, China

Jun Liu, Sichuan University, China

Ellis Loew, Cornell University, USA

Paul Lu, University of California, San Diego, USA

Yunxia Lundberg, Boys Town National Research Hospital, USA

Zhen Ma, Syracuse University, USA

Weihua Ma, Huazhong Agricultural University, China

Yumi Maeda, National Institute of Infectious Diseases, Japan

Anabela Maia, Rhode Island College, USA

Assaf Malik, University of Haifa, Israel

Markus Maniak, Kassel University, Germany

Miguel Manzanares, Spanish National Center for Cardiovascular Research, Spain

Frantisek Marec, Institute of Entomology, Czech Republic

Steven Markus, Colorado State University, USA

Alberto Marti-Rodrigo, University of Valencia, Spain

Jean-Charles Massabuau, University of Bordeaux, France

Roberto Mayor, University College London, UK

Prof. Satyajit Mayor, National Centre for Biological Sciences, India  
Aprotim Mazumder, Tata Institute of Fundamental Research Hyderabad, India  
Daniela Mennerich, University of Oulu, Finland  
Yi-Liang Miao, Huazhong Agricultural University, China  
Kyle Miller, University of Texas Austin, USA  
Kenneth Mills, College of the Holy Cross, USA  
Nicolas Minc, Institut Jacques Monod, France  
Yoichi Miyake, The University of Tokyo, Japan  
Barbara Molon, University of Padua, Italy  
Monica Montopoli, University of Padua, Italy  
Clinton Moran, Fairfield University, USA  
Sophie Morgani, Sloan Kettering Institute, USA  
Marina Morigi, Istituto di Ricerche Farmacologiche Mario Negri, Italy  
Ryuji Morizane, Brigham and Women's Hospital, USA  
Simon Morley, University of Sussex, UK  
Enrico Moro, University of Padova, Italy  
Ciaran Morrison, National University of Ireland Galway, Ireland  
Bernice Morrow, Albert Einstein College of Medicine, USA  
Xiuqian Mu, University at Buffalo, USA  
Ulrike Muller, California State University, USA  
Mikiko Nagashima, University of Michigan, USA  
James Nagler, University of Idaho, USA  
Atsushi Nakajima, Yokohama City University, Japan  
Takehito Nakazawa, Kyoto University, Japan  
A Navas, Museo Nacional de Ciencias Naturales, Spain  
Benjamin Neely, National Institute of Standards and Technology, USA  
Jiri Neustupa, Charles University Prague, Czech Republic  
Jennifer Nichols, University of Cambridge, UK  
Peter Nick, University of Karlsruhe, Germany  
Philipp Niethammer, Memorial Sloan Kettering Cancer Center, USA

Baitang Ning, National Center for Toxicological Research, USA

Tony Nolan, Imperial College London, UK

Jacob Notbohm, University of Wisconsin-Madison, USA

Glaucius Oliva, University of Sao Paulo, Brazil

Ellis O'Neill, University of Oxford, UK

Shoichiro Ono, Emory University, USA

Amos Orlofsky, Albert Einstein College of Medicine, USA

Jose Oteros, Technical University of Munich, Germany

Jenny Ouyang, University of Nevada, USA

Robert Owen, University of Sheffield, UK

Eva Palsson-McDermott, Trinity College, Ireland

Kristen Panfilio, University of Cologne, Germany

Janice Pappas, University of Michigan, USA

Clare Parker Fischer, The Loomis Chaffee School, USA

Soumen Paul, University of Kansas Medical Center, USA

M Peffers, Institute of Ageing and Chronic Disease, UK

Luigi Petrone, Brookes Bell Group, Hong Kong

Peter Pfeffer, Victoria University of Wellington, New Zealand

Andrea Phillott, FLAME University, India

Marysia Placzek, University of Sheffield, UK

Berenika Plusa, University of Manchester, UK

Federica Poli, University of Western Australia, Australia

Giovanna Pontarin, University of Padua, Italy

Hans-Otto Portner, Alfred-Wegener-Institute, Germany

Harun Prim, King Fahd University of Petroleum and Minerals, Saudi Arabia

Kevin Pumiglia, Albany Medical College, USA

Jianwen Que, Columbia University Medical Center, USA

Roy Quinlan, Durham University, UK

Ruben Quintana-Cabrera, University of Salamanca, Spain

Roel Quintens, Belgian Nuclear Research Centre, Belgium

David Raible, University of Washington, USA

David Raubenheimer, University of Sydney, New Zealand

Maurizio Recanatini, University of Bologna, Italy

Adam Reitzel, University of North Carolina at Charlotte, USA

Stephen Renshaw, University of Sheffield, UK

Linda Restifo, University of Arizona, USA

Bruce Riley, Texas A&M University, USA

Rita Roberti, University of Perugia, Italy

Steve Rogers, University of North Carolina at Chapel Hill, USA

Stefan Rose-John, University of Kiel, Germany

Stephen Royle, University of Warwick, UK

Sanya Roysommuti, Khon Kaen University, Thailand

Christiana Ruhrberg, UCL Institute of Ophthalmology, UK

Mario Saberon, UNAM, Mexico

Balal Sadeghi, Shahid Bahonar University of Kerman, Iran

Sanjeev Sahni, University of Texas, USA

Jafar Salimian, Baqiyatallah University of Medical Sciences, Iran

Michele Samaja, University of Milan, Italy

Christopher Sanford, Kennesaw State University, USA

Corrado Santocanale, National University of Ireland Galway, Ireland

Luis Sargento, Pulido Valente Hospital, Portugal

Yutaka Satou, Kyoto University, Japan

Micahel Scantlebury, Queens University, UK

Thomas Schilling, University of California, Irvine, USA

Gerhard Schlosser, University of Bremen, Germany

Hanno Schmidt, University of California, Davis, USA

Jonathan Schneider, University of Toronto at Mississauga, Canada

Marielle Schneider, Universidade Federal de São Paulo, Brazil

Frank Schnorrer, Institut de Biologie du Développement de Marseille (IBDM), France

Steffen Scholpp, University of Exeter, UK

Quenten Schwarz, University of South Australia, Australia

Michael Sears, Clemson University, USA

Jakub Sedzinski, University of Copenhagen, Denmark

Hideki Senoh, Japan Bioassay Research Center, Japan

Ramon Serrano, University of Valencia, Spain

Luchen Shan, Jinan University College of Pharmacy, China

Jixiu Shan, University of Florida, USA

Marcos Simoes-Costa, Cornell University, USA

Mike Simone-Finstrom, US Department of Agriculture, USA

Kai Simons, Max-Planck-Institute of Molecular Cell Biology and Genetics, Germany

Yoon Sin Oh, Eulji University, South Korea

Nini Sissener, National Institute of Nutrition and Seafood Research, Norway

Andrew Smith, Ithaca College, USA

Shana Smith, National Taiwan University, Taiwan

L. Courtney Smith, George Washington University, USA

Marta Solé, BarcelonaTech, Spain

Cedric Soler, Clermont Auvergne University, France

Yong-Seok Song, Konkuk University, South Korea

Sami Souissi, Lille University, France

David Stern, Howard Hughes Medical Institute, USA

Don Stevens, University of Prince Edward Island, Canada

Lovorka Stojic, University of Cambridge, UK

Kate Storey, University of Dundee, UK

Michael Strand, University of Georgia, USA

Flavie Strappazon, IRCCS Santa Lucia, Italy

Shuzo Sugita, University Health Network, Canada

Wei Sun, Nanjing Medical University, China

Jon Svendsen, University of Copenhagen, Denmark

Tomohiko Taguchi, Tohoku University, Japan

Nobuaki Takahashi, Harvard University, USA

Barbara Tanos, The Institute of Cancer Research, UK  
Yongguang Tao, Central South University, China  
Anne-Marie Tassin, I2BC, France  
David Taylor, Trinity College Dublin, Ireland  
Vinay Tergaonkar, National University of Singapore, Singapore  
Manuel Thèry, CEA, France  
Vengatesen Thiyagarajan, University of Hong Kong, Hong Kong  
Natascia Tiso, University of Padua, Italy  
Edda Tobiasch, University of Applied Sciences Bonn-Rhein-Sieg, Germany  
Lars Tomanek, California Polytechnic State University, USA  
Marija Tomic, Robotics Laboratory, Serbia  
Sanjida Topa, Swinburne University of Technology, Australia  
Lluís Tort, UAB Barcelona, Spain  
Takashi Toyofuku, Japan Agency for Marine-Earth Science and Technology, Japan  
E Tulchinsky, University of Leicester, UK  
Margherita Turco, University of Cambridge, UK  
Beatrice Tyrrell, University of Oxford, UK  
Ryan Udan, Missouri State University, USA  
Paola Ungaro, Consiglio Nazionale delle Ricerche, Italy  
Seppo Vainio, University of Oulu, Finland  
Ruud van den Bos, Radboud University, Netherlands  
Thijs van Mens, University of Amsterdam, Netherlands  
Eduard Venter, University of Johannesburg, South Africa  
Carlo viscomi, Medical Research Council, UK  
Anais Vitorino Carvalho, INRA, France  
Vladimir Vladimirov, Virginia Institute for Psychiatric and Behavioral Genetics, USA  
Harissios Vliagoftis, Walter C. Mackenzie Health Sciences Centre, Canada  
Ferdinand von Meyenn, Babraham Institute, UK  
Mark Wachol, Washington University School of Medicine, USA  
Ronald Waclaw, Cincinnati Children's Hospital, USA

Yuxiang Wang, Memorial Sloan Kettering Cancer Center, USA

Yanzhuang Wang, University of Michigan, USA

Paul Wassarman, Mount Sinai School of Medicine, USA

Yin Wei, Sun Yat Sen University, China

Phyllis Weintraub, Agricultural Research Organization, Israel

Katherine West, University of Glasgow, UK

Richard Wheeler, University of Oxford, UK

Michael Wilkie, Wilfrid Laurier University, Canada

Carmen Williams, National Institute of Environmental Health Sciences, USA

Steffen Willwacher, German Sport University Cologne, Germany

Peter Wolf, University of Bayreuth, Germany

Sharon Wolf, The Weizmann Institute, Israel

Bernie Wone, University of South Dakota, USA

Tristram Wyatt, University of Oxford, UK

Mun Fei Yam, Universiti Sains Malaysia, Malaysia

Hiroshi Yamada, Kyushu Institute of Technology, Japan

T Yamamoto, Shimane University, Japan

Kazuhiro Yamamoto, University of Liverpool, UK

Yan Yan, Hong Kong University of Science and Technology, Hong Kong

Qi-Long Ying, University of Southern California, USA

Taishi Yoshiii, Okayama University, Japan

Tim Young, Auckland University of Technology, New Zealand

Mario Zaiss, Universitätsklinikum Erlangen, Germany

Casey Zakroff, Woods Hole Oceanographic Institution, USA

Kamarul Zarkasi, Universiti Sains Malaysia, Malaysia

Jakub Zdarta, Polish University of Technology, Poland

Robert Zeller, San Diego State University, USA

Grace Zhai, Miami University, USA

Lanjing Zhang, Rutgers University, USA

Nianhui Zhang, Key Laboratory of Bio-Resource and Eco-Environment of Ministry of Education, China

Yong Zhang, Northwest A&F University, China

Guang Zhou, Case Western Reserve University, USA
